# Supplementary material for: High-Throughput Identification of Adaptive Mutations in Experimentally Evolved Yeast Populations
Source: PubMed Central journal article supplement (PMC5065121; doi:10.1371/journal.pgen.1006339), 2016-10-11

Figure S1

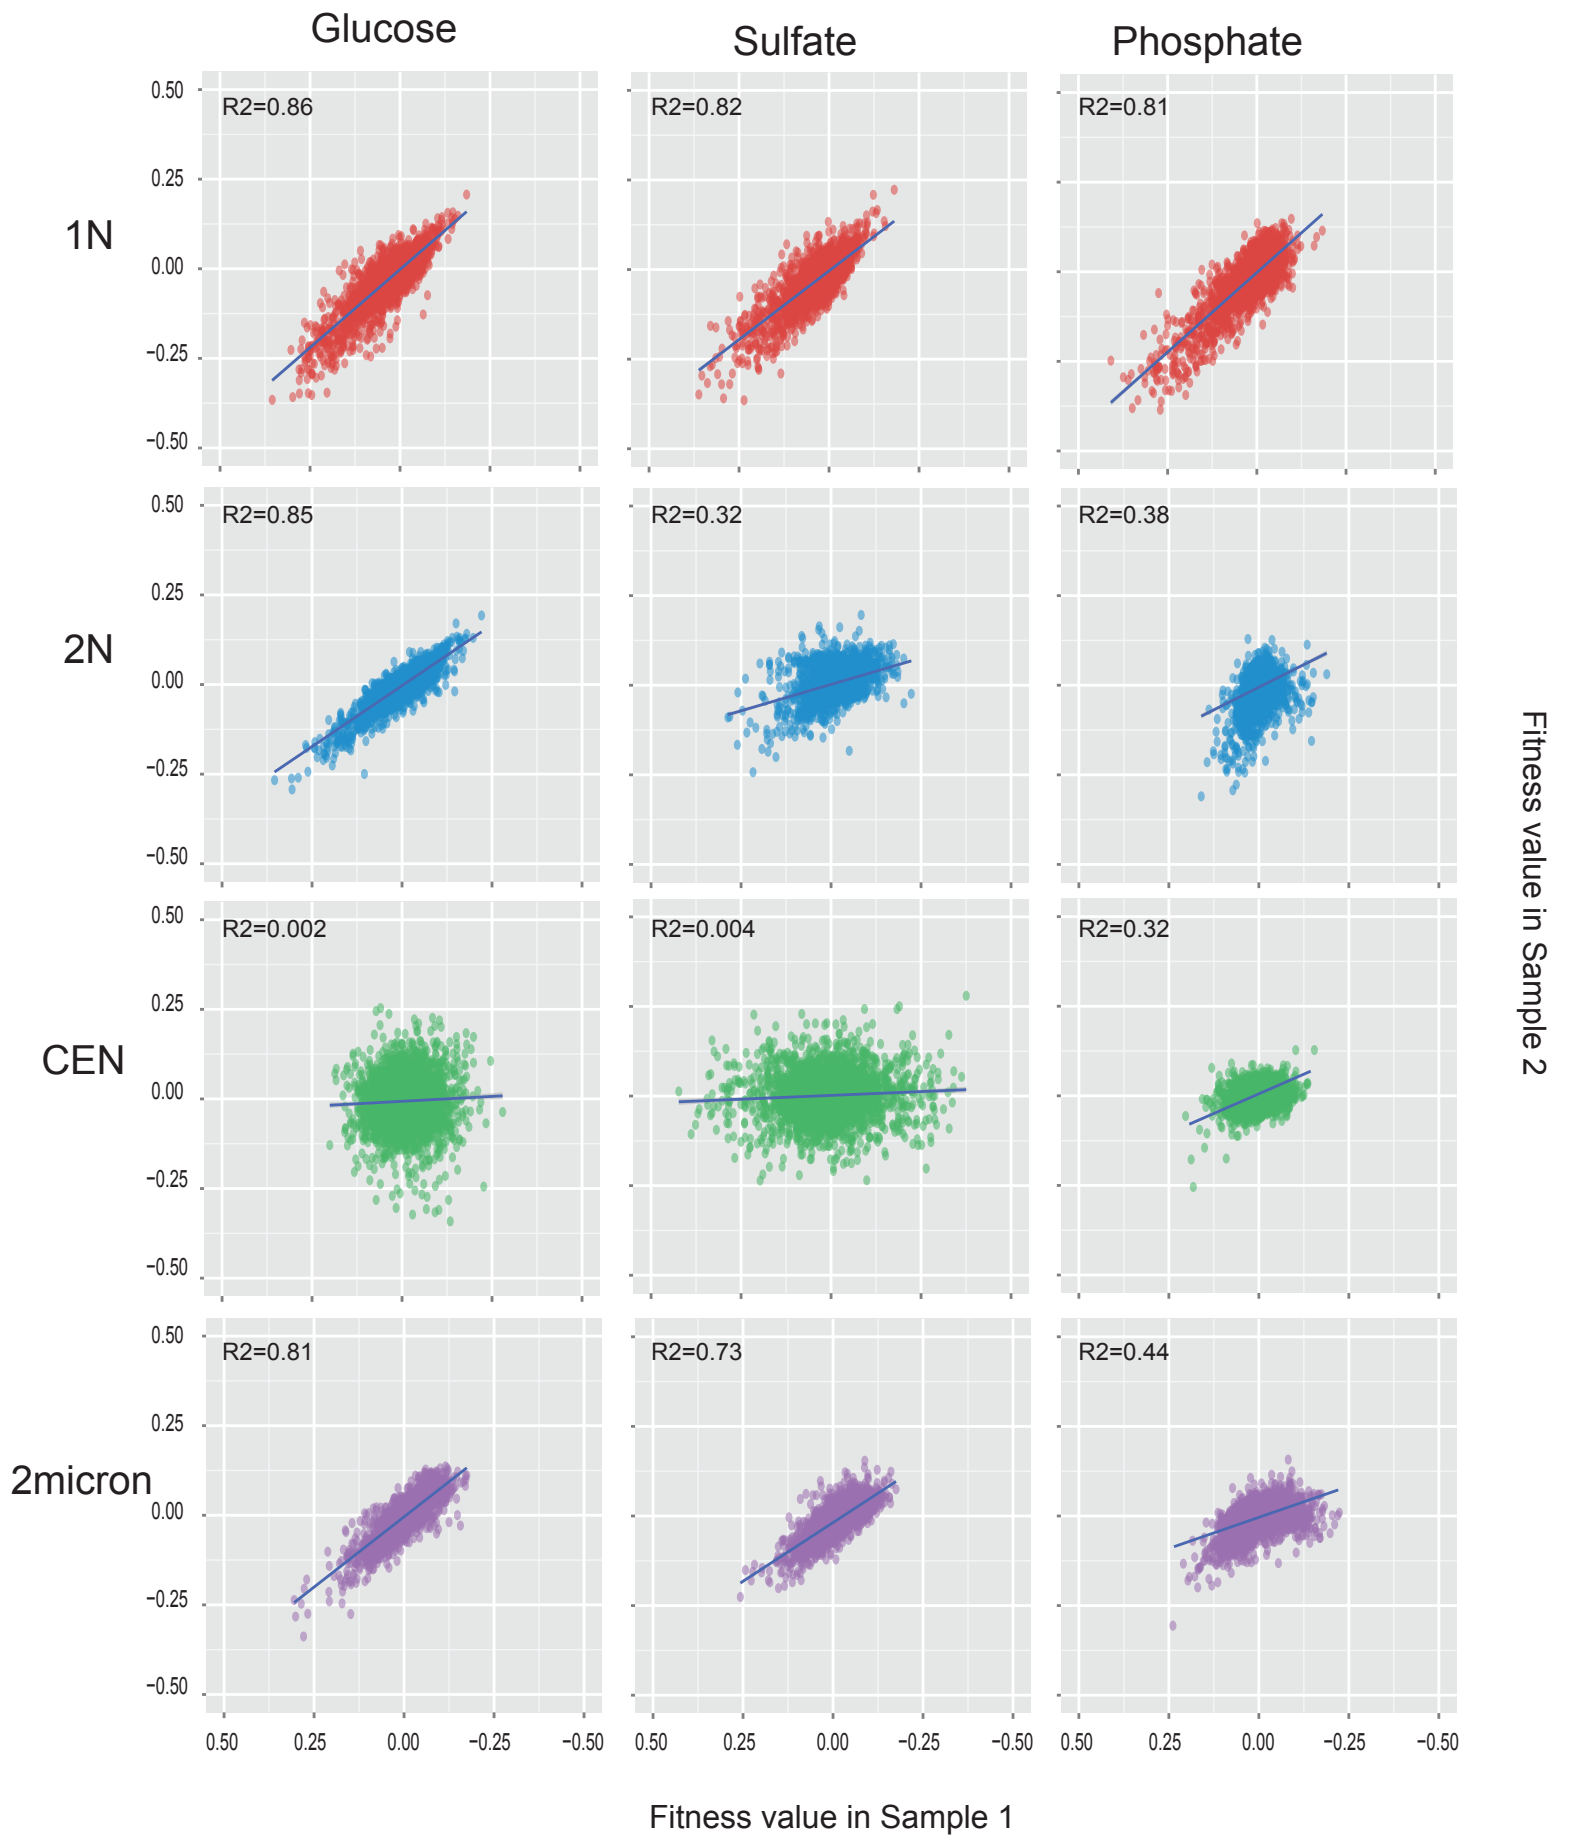

Supplement: pgen.1006339.s001.pdf [file pgen.1006339.s001.pdf]
