# Supplementary material for: High-Throughput Identification of Adaptive Mutations in Experimentally Evolved Yeast Populations
Source: PLoS Genet. 2016 Oct 11;12(10):e1006339. doi: 10.1371/journal.pgen.1006339 (PMC5065121; doi:10.1371/journal.pgen.1006339)
Supplement: S5 Table — Notes: 1) Systematic and Standard names correspond to the name of the target gene. 2) Only mutations with a fitness >0.10 are reported here. 3) The limitation indicates the condition in which a particular fitness was determined. 4) Detected in Evolution: if a mutation in the gene was reported in an evolution experiment, the SNPeff effect is reported; otherwise, “Not found” is indicated. 5) Recurrent: indicates the number of times the gene was found mutated in the evolution experiments. 6) The conditions in which the gene was been found mutated in the evolution experiments. (XLSX) [file pgen.1006339.s011.xlsx]

## Sheet: Sheet1
Table S5: Beneficial mutations from the mutant collection competitions
Notes:
1-Systematic and Standard name corresponds to the name of the gene targeted in the collection
2-Only genes with a fitness >0.10 have been reported here
3-The limitation indicates the condition (glucose-, sulfate- or phosphate-limited) under which a particular fitness was determined.
4-Detected in Evolution: if a mutation in the gene has been reported in an evolution experiment, the SNPeff effect is reported; otherwise Not found is indicated
5-Recurrent: indicates the number of times this gene has been found with a mutation in the evolution experiments
6-The conditions in which the gene has been found mutated
Systematic_Name	Standard_Name	Fitness	Collection	Limitation	Detected in Evolution (if found the SNPeff information is indicated)	Recurrent	Conditions_evolution
YPR159W	KRE6	0.118927	CEN	Glucose	Moderate	4	YPD
YPR135W	CTF4	0.119822	CEN	sulfate	Not found	0
YPR124W	CTR1	0.100959	CEN	sulfate	Moderate	2	Allantoin
YPR110C	RPC40	0.114701	2micron	Phosphate	Not found	0
YPR107C	YTH1	0.16172	CEN	Glucose	Not found	0
YPR086W	SUA7	0.148501	CEN	Glucose	Not found	0
YPR057W	BRR1	0.127708	MM1N	sulfate	Not found	0
YPR032W	SRO7	0.12031	2micron	sulfate	Not found	0
YPR032W	SRO7	0.113152	2micron	Glucose	Not found	0
YPR030W	CSR2	0.116463	2micron	Phosphate	Not found	0
YPR019W	MCM4	0.162023	CEN	Glucose	Not found	0
YPL258C	THI21	0.198008	CEN	sulfate	Not found	0
YPL256C	CLN2	0.120792	CEN	Glucose	High	1	glucose
YPL252C	YAH1	0.114513	CEN	sulfate	Not found	0
YPL248C	GAL4	0.139635	CEN	sulfate	High	3	YPD
YPL229W		0.167839	CEN	sulfate	Not found	0
YPL215W	CBP3	0.104652	CEN	Glucose	Not found	0
YPL206C	PGC1	0.136843	CEN	Glucose	Not found	0
YPL203W	TPK2	0.135802	2micron	Glucose	Not found	0
YPL202C	AFT2	0.106927	CEN	sulfate	Not found	0
YPL166W	ATG29	0.135017	CEN	sulfate	Not found	0
YPL158C	AIM44	0.176268	CEN	sulfate	Not found	0
YPL152W	RRD2	0.125029	2micron	Phosphate	Not found	0
YPL143W	RPL33A	0.119456	MM2N	sulfate	Not found	0
YPL142C		0.128543	MM2N	sulfate	Not found	0
YPL137C	GIP3	0.131559	2micron	Phosphate	Not found	0
YPL129W	TAF14	0.103045	MM2N	sulfate	Not found	0
YPL112C	PEX25	0.146902	CEN	Glucose	Not found	0
YPL106C	SSE1	0.124364	2micron	Glucose	Not found	0
YPL094C	SEC62	0.126523	CEN	Glucose	Not found	0
YPL071C		0.107206	MM2N	Glucose	Not found	0
YPL071C		0.116671	CEN	sulfate	Not found	0
YPL070W	MUK1	0.135123	MM2N	Glucose	High	2	glucose
YPL045W	VPS16	0.140673	MM2N	Glucose	Not found	0
YPL038W-A		0.12612	CEN	Glucose	Not found	0
YPL026C	SKS1	0.121643	CEN	Glucose	Not found	0
YPL012W	RRP12	0.106457	CEN	sulfate	Not found	0
YPL005W	AEP3	0.110576	CEN	Glucose	Moderate	5	glucose
YOR374W	ALD4	0.112662	2micron	Phosphate	Not found	0
YOR365C		0.110942	CEN	Glucose	Not found	0
YOR338W		0.108125	MM1N	sulfate	Moderate	1	YPD
YOR312C	RPL20B	0.106219	CEN	sulfate	Not found	0
YOR301W	RAX1	0.127167	2micron	Phosphate	Not found	0
YOR285W	RDL1	0.129395	MM1N	Glucose	Not found	0
YOR273C	TPO4	0.106179	CEN	Glucose	Not found	0
YOR265W	RBL2	0.130428	MM2N	sulfate	Not found	0
YOR262W		0.107048	MM2N	sulfate	Not found	0
YOR216C	RUD3	0.136402	2micron	Phosphate	Not found	0
YOR210W	RPB10	0.139663	CEN	Glucose	Not found	0
YOR208W	PTP2	0.103359	CEN	Glucose	Moderate	1	YPD
YOR206W	NOC2	0.111744	MM2N	sulfate	Not found	0
YOR205C	GEP3	0.110639	CEN	sulfate	Not found	0
YOR173W	DCS2	0.116881	CEN	Glucose	Not found	0
YOR160W	MTR10	0.136066	CEN	sulfate	Not found	0
YOR152C		0.107571	CEN	Glucose	Moderate	1	glucose
YOR147W	MDM32	0.126326	2micron	Glucose	Not found	0
YOR136W	IDH2	0.116971	CEN	Glucose	Not found	0
YOR118W	RTC5	0.125588	2micron	Glucose	Not found	0
YOR105W		0.100791	MM2N	sulfate	Not found	0
YOR090C	PTC5	0.119681	CEN	sulfate	Not found	0
YOR083W	WHI5	0.103847	MM2N	Glucose	Not found	0
YOR082C		0.107613	MM2N	Glucose	Not found	0
YOR080W	DIA2	0.119409	CEN	sulfate	Not found	0
YOR068C	VAM10	0.101628	CEN	sulfate	Not found	0
YOR064C	YNG1	0.134538	2micron	Phosphate	Not found	0
YOR058C	ASE1	0.11391	CEN	sulfate	Not found	0
YOR043W	WHI2	0.195975	MM1N	Glucose	High	10	YPD
YOR043W	WHI2	0.122233	MM1N	Phosphate	High	10	YPD
YOR005C	DNL4	0.105623	2micron	Glucose	Not found	0
YOR002W	ALG6	0.121041	CEN	Glucose	Not found	0
YOL140W	ARG8	0.110406	CEN	sulfate	Not found	0
YOL138C	RTC1	0.106143	2micron	Phosphate	Not found	0
YOL136C	PFK27	0.135683	MM1N	Glucose	Not found	0
YOL120C	RPL18A	0.140944	CEN	sulfate	Not found	0
YOL113W	SKM1	0.124227	2micron	Phosphate	Moderate	1	YPD
YOL105C	WSC3	0.111082	MM2N	sulfate	Not found	0
YOL105C	WSC3	0.141332	MM2N	Glucose	Not found	0
YOL105C	WSC3	0.105941	MM1N	Glucose	Not found	0
YOL100W	PKH2	0.10517	2micron	Phosphate	Not found	0
YOL098C		0.101856	CEN	Glucose	Not found	0
YOL092W		0.143905	2micron	Phosphate	Not found	0
YOL090W	MSH2	0.110408	2micron	Phosphate	Not found	0
YOL053W	AIM39	0.106752	CEN	sulfate	Moderate	1	YPD
YOL023W	IFM1	0.105433	2micron	Glucose	Not found	0
YNR072W	HXT17	0.153117	CEN	sulfate	Not found	0
YNR031C	SSK2	0.130368	MM1N	Glucose	High	4	glucose
YNR026C	SEC12	0.192843	CEN	Glucose	Not found	0
YNR004W		0.141545	MM1N	sulfate	Not found	0
YNR001C	CIT1	0.108794	CEN	sulfate	Not found	0
YNL329C	PEX6	0.174996	CEN	Glucose	Not found	0
YNL292W	PUS4	0.100834	CEN	sulfate	Not found	0
YNL286W	CUS2	0.104345	2micron	sulfate	Not found	0
YNL229C	URE2	0.108137	2micron	Phosphate	Not found	0
YNL192W	CHS1	0.220204	CEN	sulfate	Not found	0
YNL183C	NPR1	0.119487	2micron	Phosphate	Not found	0
YNL182C	IPI3	0.159429	CEN	sulfate	Low	1	YPD
YNL167C	SKO1	0.128708	CEN	sulfate	Not found	0
YNL123W	NMA111	0.128528	CEN	sulfate	Moderate	1	sulfate
YNL119W	NCS2	0.100351	2micron	Phosphate	Not found	0
YNL102W	POL1	0.101519	2micron	Glucose	Moderate	1	YPD
YNL101W	AVT4	0.123032	MM2N	sulfate	Not found	0
YNL087W	TCB2	0.10275	2micron	Phosphate	Not found	0
YNL069C	RPL16B	0.17657	CEN	Glucose	Not found	0
YNL049C	SFB2	0.113989	CEN	sulfate	Amplification	1
YNL049C	SFB2	0.129962	CEN	Glucose	Amplification	1
YNL044W	YIP3	0.102202	MM1N	sulfate	Not found	0
YNL038W	GPI15	0.175249	2micron	Phosphate	Not found	0
YNL031C	HHT2	0.132288	MM2N	Glucose	Not found	0
YMR298W	LIP1	0.119886	CEN	sulfate	Not found	0
YMR289W	ABZ2	0.114755	CEN	Glucose	Not found	0
YMR286W	MRPL33	0.109661	CEN	Glucose	Not found	0
YMR281W	GPI12	0.106771	CEN	sulfate	Not found	0
YMR279C		0.106033	CEN	sulfate	Not found	0
YMR275C	BUL1	0.103663	CEN	Glucose	Not found	0
YMR273C	ZDS1	0.128319	CEN	Glucose	Not found	0
YMR269W	TMA23	0.117897	2micron	Phosphate	Not found	0
YMR258C		0.116015	CEN	sulfate	Not found	0
YMR258C		0.109573	CEN	Glucose	Not found	0
YMR255W	GFD1	0.133549	2micron	Phosphate	Not found	0
YMR237W	BCH1	0.104211	2micron	Phosphate	Moderate	1	YPD
YMR208W	ERG12	0.14422	CEN	Glucose	Not found	0
YMR190C	SGS1	0.11687	2micron	Phosphate	Not found	0
YMR185W		0.113823	CEN	sulfate	Moderate	1	glucose
YMR176W	ECM5	0.119788	CEN	sulfate	Moderate	1	YPD
YMR172W	HOT1	0.108811	CEN	Glucose	Not found	0
YMR164C	MSS11	0.100817	MM2N	Glucose	Not found	0
YMR137C	PSO2	0.106949	CEN	Glucose	Not found	0
YMR131C	RRB1	0.103164	MM2N	sulfate	Not found	0
YMR120C	ADE17	0.175992	CEN	Glucose	Moderate	1	sulfate
YMR089C	YTA12	0.112748	CEN	Glucose	Moderate	1	YPD
YMR088C	VBA1	0.104252	2micron	Phosphate	Not found	0
YMR054W	STV1	0.152712	CEN	Glucose	Not found	0
YMR053C	STB2	0.107609	MM2N	sulfate	Not found	0
YMR052W	FAR3	0.126798	CEN	sulfate	Not found	0
YMR037C	MSN2	0.128105	CEN	Glucose	Not found	0
YMR029C	FAR8	0.118809	CEN	sulfate	Not found	0
YMR026C	PEX12	0.165659	CEN	Glucose	Not found	0
YMR022W	UBC7	0.113674	MM1N	Glucose	Not found	0
YMR021C	MAC1	0.249023	CEN	sulfate	Not found	0
YMR015C	ERG5	0.101923	MM1N	Glucose	Moderate	2	glucose
YML122C		0.100112	MM2N	sulfate	Not found	0
YML119W		0.109342	MM2N	sulfate	Not found	0
YML115C	VAN1	0.150716	CEN	sulfate	Not found	0
YML115C	VAN1	0.113531	CEN	Glucose	Not found	0
YML102W	CAC2	0.104129	MM2N	sulfate	Not found	0
YML093W	UTP14	0.120928	MM2N	Glucose	Not found	0
YML088W	UFO1	0.109667	MM2N	Phosphate	Not found	0
YML088W	UFO1	0.21284	CEN	sulfate	Not found	0
YML083C		0.146017	CEN	Glucose	Not found	0
YML069W	POB3	0.207034	CEN	sulfate	Moderate	1	glucose
YML053C		0.128115	CEN	Glucose	Not found	0
YML049C	RSE1	0.159604	CEN	sulfate	Moderate	1	YPD
YML047C	PRM6	0.108757	CEN	sulfate	Not found	0
YML042W	CAT2	0.14251	CEN	Glucose	Moderate	1	YPD
YML036W	CGI121	0.162645	CEN	sulfate	Not found	0
YML029W	USA1	0.109273	MM1N	Glucose	Not found	0
YML025C	YML6	0.124451	2micron	Glucose	Not found	0
YML017W	PSP2	0.104697	2micron	sulfate	Not found	0
YLR460C		0.114918	CEN	sulfate	Not found	0
YLR460C		0.128058	2micron	Phosphate	Not found	0
YLR407W		0.103366	MM1N	Phosphate	Low	1	glucose
YLR399C	BDF1	0.12038	MM2N	Glucose	Not found	0
YLR390W-A	CCW14	0.102584	2micron	Glucose	Not found	0
YLR387C	REH1	0.122348	CEN	Glucose	Not found	0
YLR383W	SMC6	0.154812	CEN	Glucose	Not found	0
YLR370C	ARC18	0.109045	MM2N	Glucose	Not found	0
YLR353W	BUD8	0.111502	CEN	sulfate	Moderate	1	YPD
YLR342W-A		0.121791	CEN	sulfate	Not found	0
YLR340W	RPP0	0.114313	MM1N	Glucose	Not found	0
YLR332W	MID2	0.106836	2micron	sulfate	Moderate	1	YPD
YLR320W	MMS22	0.14313	MM2N	Glucose	Not found	0
YLR320W	MMS22	0.139706	MM1N	Glucose	Not found	0
YLR319C	BUD6	0.128107	MM2N	Glucose	Moderate	1	sulfate
YLR318W	EST2	0.105469	MM2N	Glucose	Not found	0
YLR318W	EST2	0.119505	CEN	Glucose	Not found	0
YLR315W	NKP2	0.127272	MM1N	Glucose	Not found	0
YLR311C		0.113955	MM2N	Glucose	Not found	0
YLR309C	IMH1	0.107822	MM2N	Glucose	Not found	0
YLR308W	CDA2	0.107462	MM2N	Glucose	Not found	0
YLR307W	CDA1	0.10375	MM2N	sulfate	Not found	0
YLR307W	CDA1	0.101981	MM2N	Glucose	Not found	0
YLR306W	UBC12	0.116817	MM2N	Glucose	Not found	0
YLR300W	EXG1	0.117102	MM2N	Glucose	Not found	0
YLR297W		0.109345	MM2N	sulfate	Not found	0
YLR294C		0.12589	MM2N	Glucose	Not found	0
YLR290C		0.117496	2micron	Phosphate	Not found	0
YLR285W	NNT1	0.110744	MM2N	Glucose	Moderate	1	YPD
YLR284C	ECI1	0.113649	MM2N	sulfate	Not found	0
YLR284C	ECI1	0.110662	MM2N	Glucose	Not found	0
YLR283W		0.123771	MM2N	Glucose	Not found	0
YLR282C		0.114105	MM2N	Glucose	Not found	0
YLR281C		0.107895	MM2N	sulfate	Not found	0
YLR281C		0.129456	MM2N	Glucose	Not found	0
YLR281C		0.10158	MM1N	Phosphate	Not found	0
YLR281C		0.14105	CEN	Phosphate	Not found	0
YLR280C		0.101292	MM1N	Glucose	Not found	0
YLR276C	DBP9	0.177541	2micron	Phosphate	Not found	0
YLR254C	NDL1	0.125879	MM1N	Glucose	Not found	0
YLR205C	HMX1	0.178391	CEN	sulfate	Not found	0
YLR153C	ACS2	0.112906	2micron	Glucose	Not found	0
YLR150W	STM1	0.129277	2micron	Glucose	Not found	0
YLR134W	PDC5	0.185854	CEN	Glucose	Not found	0
YLR131C	ACE2	0.157343	2micron	Phosphate	Moderate	13	YPD
YLR130C	ZRT2	0.215822	CEN	Glucose	Moderate	1	YPD
YLR113W	HOG1	0.15221	MM1N	Glucose	High	2	glucose
YLR050C		0.134988	CEN	sulfate	Not found	0
YLR020C	YEH2	0.132207	CEN	Glucose	Not found	0
YLR016C	PML1	0.173823	CEN	sulfate	Not found	0
YLR014C	PPR1	0.107437	2micron	sulfate	Not found	0
YLR004C	THI73	0.101074	2micron	Glucose	Not found	0
YLR003C	CMS1	0.120364	MM1N	Glucose	Not found	0
YLL056C		0.118638	CEN	sulfate	Not found	0
YLL055W	YCT1	0.216289	CEN	Glucose	Not found	0
YLL039C	UBI4	0.113075	MM1N	sulfate	Not found	0
YLL039C	UBI4	0.115576	CEN	sulfate	Not found	0
YLL026W	HSP104	0.106706	CEN	sulfate	Not found	0
YLL026W	HSP104	0.144042	2micron	Phosphate	Not found	0
YLL011W	SOF1	0.181722	CEN	sulfate	Not found	0
YKR106W		0.136707	CEN	Glucose	Not found	0
YKR097W	PCK1	0.181212	CEN	sulfate	Not found	0
YKR065C	PAM17	0.115022	CEN	Glucose	Not found	0
YKR064W	OAF3	0.112521	CEN	sulfate	Moderate	2	Allantoin
YKR058W	GLG1	0.111273	2micron	sulfate	Not found	0
YKR030W	GMH1	0.103721	2micron	sulfate	Not found	0
YKR025W	RPC37	0.105733	MM2N	sulfate	Not found	0
YKR004C	ECM9	0.1377	CEN	sulfate	Not found	0
YKL213C	DOA1	0.116611	MM1N	Phosphate	Not found	0
YKL210W	UBA1	0.101632	CEN	Glucose	Not found	0
YKL208W	CBT1	0.106002	2micron	Glucose	Not found	0
YKL204W	EAP1	0.117753	CEN	sulfate	Not found	0
YKL191W	DPH2	0.181564	CEN	sulfate	Not found	0
YKL182W	FAS1	0.17945	CEN	sulfate	Moderate	1	YPD
YKL174C	TPO5	0.107444	CEN	Glucose	Moderate	1	YPD
YKL171W		0.117388	MM2N	sulfate	Not found	0
YKL157W	APE2	0.114819	CEN	Glucose	Not found	0
YKL134C		0.116215	CEN	Glucose	Not found	0
YKL108W	SLD2	0.105301	CEN	Glucose	Not found	0
YKL095W	YJU2	0.100787	2micron	Glucose	Not found	0
YKL064W	MNR2	0.106948	2micron	Glucose	Not found	0
YKL039W	PTM1	0.111514	CEN	sulfate	Not found	0
YKL027W		0.107756	CEN	sulfate	Not found	0
YKL025C	PAN3	0.119005	MM1N	sulfate	Not found	0
YKL014C	URB1	0.113527	2micron	Phosphate	Low	1	YPD
YKL013C	ARC19	0.160612	MM2N	Glucose	Not found	0
YJR133W	XPT1	0.106337	CEN	Glucose	Not found	0
YJR127C	RSF2	0.18948	CEN	sulfate	Low	1	YPD
YJR123W	RPS5	0.150239	CEN	Glucose	Not found	0
YJR112W	NNF1	0.141258	2micron	Phosphate	Not found	0
YJR072C	NPA3	0.107083	MM2N	sulfate	Not found	0
YJR065C	ARP3	0.152554	MM2N	Glucose	Not found	0
YJR050W	ISY1	0.144113	MM1N	sulfate	Not found	0
YJR048W	CYC1	0.125949	CEN	sulfate	Not found	0
YJR041C	URB2	0.186832	CEN	sulfate	Moderate	2	YPD
YJR019C	TES1	0.128403	2micron	Phosphate	Not found	0
YJR014W	TMA22	0.126203	CEN	sulfate	Not found	0
YJL214W	HXT8	0.179306	2micron	Phosphate	Moderate	1	YPD
YJL171C		0.103029	2micron	Phosphate	High	3	YPD
YJL169W		0.144178	MM1N	sulfate	Not found	0
YJL168C	SET2	0.138941	MM1N	sulfate	Moderate	1	YPD
YJL141C	YAK1	0.10768	MM1N	Phosphate	Not found	0
YJL141C	YAK1	0.13404	CEN	sulfate	Not found	0
YJL128C	PBS2	0.107035	MM2N	Glucose	High	2	glucose
YJL128C	PBS2	0.144288	MM1N	Glucose	High	2	glucose
YJL109C	UTP10	0.104938	CEN	Glucose	Low	1	YPD
YJL108C	PRM10	0.167282	CEN	sulfate	Not found	0
YJL102W	MEF2	0.105823	2micron	Glucose	Not found	0
YJL100W	LSB6	0.168299	CEN	sulfate	Not found	0
YJL099W	CHS6	0.126008	CEN	sulfate	Not found	0
YJL092W	SRS2	0.123588	CEN	sulfate	Not found	0
YJL087C	TRL1	0.11786	2micron	sulfate	Not found	0
YJL080C	SCP160	0.158404	CEN	sulfate	Moderate	1	YPD
YJL076W	NET1	0.103712	CEN	sulfate	Not found	0
YJL071W	ARG2	0.115772	2micron	Glucose	Not found	0
YJL057C	IKS1	0.107361	MM2N	sulfate	Not found	0
YJL050W	MTR4	0.107742	MM2N	sulfate	Moderate	1	YPD
YJL036W	SNX4	0.152526	CEN	Glucose	Moderate	1	sulfate
YJL020C	BBC1	0.158207	CEN	sulfate	Not found	0
YIR035C		0.122228	CEN	Glucose	Not found	0
YIR010W	DSN1	0.112424	2micron	Phosphate	Not found	0
YIR010W	DSN1	0.111136	2micron	Glucose	Not found	0
YIR005W	IST3	0.114838	MM1N	sulfate	Not found	0
YIL173W	VTH1	0.104159	MM2N	Glucose	Not found	0
YIL148W	RPL40A	0.142899	2micron	Glucose	Not found	0
YIL135C	VHS2	0.164137	CEN	sulfate	Not found	0
YIL135C	VHS2	0.101805	2micron	sulfate	Not found	0
YIL101C	XBP1	0.144169	CEN	sulfate	Not found	0
YIL067C		0.106101	CEN	sulfate	Not found	0
YIL065C	FIS1	0.206703	MM2N	Glucose	Not found	0
YIL062C	ARC15	0.163797	MM2N	Glucose	Not found	0
YIL056W	VHR1	0.106446	2micron	Phosphate	Not found	0
YIL046W	MET30	0.138286	CEN	sulfate	Not found	0
YIL046W	MET30	0.114882	CEN	Glucose	Not found	0
YIL043C	CBR1	0.119555	2micron	Phosphate	Not found	0
YIL021W	RPB3	0.139664	MM2N	Glucose	Not found	0
YHR206W	SKN7	0.111604	2micron	Glucose	Not found	0
YHR162W		0.12869	CEN	Glucose	Not found	0
YHR139C	SPS100	0.140767	CEN	sulfate	Not found	0
YHR137W	ARO9	0.106137	CEN	sulfate	Not found	0
YHR135C	YCK1	0.107371	CEN	sulfate	Not found	0
YHR135C	YCK1	0.121214	2micron	sulfate	Not found	0
YHR132C	ECM14	0.109582	CEN	sulfate	Moderate	1	glucose
YHR111W	UBA4	0.141104	CEN	sulfate	Not found	0
YHR086W	NAM8	0.102848	MM1N	sulfate	Not found	0
YHR082C	KSP1	0.150554	CEN	Glucose	Moderate	1	Glutamate
YHR077C	NMD2	0.179418	CEN	sulfate	Not found	0
YHR023W	MYO1	0.100752	2micron	Glucose	Moderate	1	YPD
YHR021W-A	ECM12	0.122044	MM2N	sulfate	Not found	0
YHL040C	ARN1	0.159108	CEN	Glucose	Not found	0
YHL034C	SBP1	0.100878	CEN	Glucose	Not found	0
YHL019C	APM2	0.156988	CEN	Glucose	Not found	0
YHL017W		0.114409	2micron	Phosphate	Moderate	1	glucose
YHL012W		0.155197	CEN	sulfate	Not found	0
YHL007C	STE20	0.111096	CEN	sulfate	Not found	0
YGR260W	TNA1	0.104814	CEN	Glucose	Not found	0
YGR249W	MGA1	0.121285	2micron	Glucose	Moderate	1	YPD
YGR238C	KEL2	0.104125	CEN	sulfate	Not found	0
YGR234W	YHB1	0.109426	2micron	Glucose	Not found	0
YGR223C	HSV2	0.124945	MM2N	sulfate	Not found	0
YGR209C	TRX2	0.105288	MM2N	sulfate	Not found	0
YGR189C	CRH1	0.167557	CEN	sulfate	Not found	0
YGR144W	THI4	0.104078	MM1N	Glucose	Not found	0
YGR125W		0.102193	CEN	sulfate	Not found	0
YGR098C	ESP1	0.108312	CEN	Glucose	Not found	0
YGR093W		0.10858	CEN	Glucose	Not found	0
YGR065C	VHT1	0.125358	CEN	sulfate	Not found	0
YGR051C		0.123738	MM2N	Phosphate	Not found	0
YGR050C		0.102584	MM1N	Phosphate	Not found	0
YGR049W	SCM4	0.11263	CEN	sulfate	Moderate	1	Ammonium
YGR049W	SCM4	0.134525	CEN	Glucose	Moderate	1	Ammonium
YGR030C	POP6	0.133908	2micron	Phosphate	Not found	0
YGR009C	SEC9	0.103888	CEN	Glucose	Not found	0
YGR003W	CUL3	0.112036	CEN	sulfate	Not found	0
YGL260W		0.101471	MM1N	Glucose	Not found	0
YGL245W	GUS1	0.108127	2micron	Glucose	Not found	0
YGL238W	CSE1	0.108813	CEN	sulfate	Low	2	YPD
YGL227W	VID30	0.208186	CEN	sulfate	Moderate	1	YPD
YGL227W	VID30	0.109726	CEN	Glucose	Moderate	1	YPD
YGL173C	XRN1	0.113756	CEN	Glucose	Low	1	YPD
YGL167C	PMR1	0.146809	CEN	sulfate	Not found	0
YGL167C	PMR1	0.12108	CEN	Glucose	Not found	0
YGL131C	SNT2	0.108952	CEN	sulfate	Not found	0
YGL126W	SCS3	0.13828	MM2N	sulfate	Low	1	YPD
YGL115W	SNF4	0.125825	2micron	sulfate	Not found	0
YGL112C	TAF6	0.106097	MM2N	sulfate	Not found	0
YGL080W	FMP37	0.101379	MM2N	sulfate	Not found	0
YGL066W	SGF73	0.165826	MM1N	sulfate	High	8	sulfate
YGL054C	ERV14	0.106758	2micron	Phosphate	Not found	0
YGL051W	MST27	0.142282	2micron	sulfate	Not found	0
YGL038C	OCH1	0.130905	2micron	sulfate	Not found	0
YGL033W	HOP2	0.16111	CEN	sulfate	High	1	YPD
YFR051C	RET2	0.12612	2micron	Glucose	Not found	0
YFR048W	RMD8	0.100456	CEN	Glucose	Not found	0
YFR043C	IRC6	0.114717	CEN	sulfate	Not found	0
YFR043C	IRC6	0.110934	CEN	Glucose	Not found	0
YFR028C	CDC14	0.128128	CEN	sulfate	Not found	0
YFR028C	CDC14	0.115611	2micron	Glucose	Not found	0
YFR026C	ULI1	0.114339	CEN	sulfate	Not found	0
YFR016C		0.11505	CEN	Phosphate	Amplification	1
YFR010W	UBP6	0.149186	MM1N	Phosphate	Not found	0
YFL060C	SNO3	0.127912	CEN	sulfate	Not found	0
YFL050C	ALR2	0.128499	CEN	Glucose	Not found	0
YFL049W	SWP82	0.130056	2micron	Phosphate	Not found	0
YFL037W	TUB2	0.117512	2micron	Phosphate	Moderate	1	Glutamate
YFL024C	EPL1	0.1033	2micron	Phosphate	Not found	0
YFL001W	DEG1	0.106942	CEN	sulfate	Not found	0
YER184C		0.113803	CEN	sulfate	Not found	0
YER175C	TMT1	0.105023	CEN	Glucose	Not found	0
YER171W	RAD3	0.112599	2micron	Phosphate	Not found	0
YER169W	RPH1	0.10395	CEN	Glucose	Not found	0
YER167W	BCK2	0.101279	2micron	Glucose	Amplification	1
YER166W	DNF1	0.102118	MM2N	sulfate	Not found	0
YER163C		0.107037	2micron	Phosphate	Amplification	1
YER154W	OXA1	0.123508	CEN	sulfate	Not found	0
YER151C	UBP3	0.135289	2micron	Glucose	Moderate	1	YPD
YER148W	SPT15	0.141829	MM2N	Glucose	Not found	0
YER141W	COX15	0.120174	CEN	Glucose	Amplification	1
YER140W		0.125826	2micron	Glucose	Amplification	1
YER137C		0.117626	CEN	Glucose	Not found	0
YER125W	RSP5	0.111653	MM2N	sulfate	Not found	0
YER125W	RSP5	0.11328	MM1N	Glucose	Not found	0
YER124C	DSE1	0.132586	2micron	Phosphate	Not found	0
YER109C	FLO8	0.154385	MM1N	Glucose	Not found	0
YER099C	PRS2	0.112561	CEN	Glucose	Moderate	1	YPD
YER089C	PTC2	0.102959	MM1N	Glucose	Moderate	1	YPD
YER070W	RNR1	0.158236	CEN	sulfate	Not found	0
YER059W	PCL6	0.101351	2micron	sulfate	Not found	0
YER048W-A	ISD11	0.141419	2micron	Phosphate	Not found	0
YER036C	ARB1	0.132266	MM1N	Phosphate	Not found	0
YER033C	ZRG8	0.105387	CEN	Glucose	Low	1	YPD
YER030W	CHZ1	0.194415	CEN	sulfate	Not found	0
YER003C	PMI40	0.114995	CEN	sulfate	Moderate	1	YPD
YEL062W	NPR2	0.146666	CEN	sulfate	Not found	0
YEL053C	MAK10	0.211548	CEN	sulfate	Not found	0
YEL053C	MAK10	0.11392	CEN	Glucose	Not found	0
YEL009C	GCN4	0.112524	2micron	Phosphate	Not found	0
YDR534C	FIT1	0.155726	CEN	sulfate	Not found	0
YDR528W	HLR1	0.115906	CEN	sulfate	Not found	0
YDR517W	GRH1	0.113532	CEN	sulfate	Not found	0
YDR499W	LCD1	0.114831	2micron	Phosphate	Not found	0
YDR497C	ITR1	0.149111	2micron	Phosphate	Not found	0
YDR482C	CWC21	0.107128	MM1N	Glucose	Not found	0
YDR473C	PRP3	0.159115	2micron	Phosphate	Not found	0
YDR453C	TSA2	0.106234	CEN	sulfate	Not found	0
YDR452W	PPN1	0.101421	2micron	Phosphate	Not found	0
YDR450W	RPS18A	0.125929	CEN	sulfate	Not found	0
YDR404C	RPB7	0.150049	MM2N	Glucose	Not found	0
YDR365C	ESF1	0.126215	CEN	sulfate	Not found	0
YDR352W		0.134627	CEN	Glucose	Not found	0
YDR336W		0.114535	2micron	Glucose	Not found	0
YDR325W	YCG1	0.122694	MM1N	Glucose	Not found	0
YDR325W	YCG1	0.10485	MM1N	Phosphate	Not found	0
YDR286C		0.118594	CEN	sulfate	Not found	0
YDR272W	GLO2	0.118957	CEN	Glucose	Not found	0
YDR251W	PAM1	0.130372	CEN	sulfate	Moderate	1	YPD
YDR249C		0.17066	CEN	sulfate	Not found	0
YDR238C	SEC26	0.13786	CEN	sulfate	Not found	0
YDR202C	RAV2	0.114704	CEN	Glucose	Low	1	YPD
YDR186C		0.1098	CEN	sulfate	Low	1	YPD
YDR172W	SUP35	0.12278	CEN	sulfate	Not found	0
YDR145W	TAF12	0.139824	MM2N	sulfate	High	2	YPD
YDR145W	TAF12	0.145349	MM2N	Glucose	High	2	YPD
YDR073W	SNF11	0.201849	MM1N	sulfate	Not found	0
YDR073W	SNF11	0.104662	MM1N	Glucose	Not found	0
YDR072C	IPT1	0.160309	MM2N	Glucose	Not found	0
YDR072C	IPT1	0.150079	MM1N	sulfate	Not found	0
YDR072C	IPT1	0.143056	MM1N	Glucose	Not found	0
YDR046C	BAP3	0.135552	CEN	Glucose	Not found	0
YDR036C	EHD3	0.166787	CEN	Glucose	Not found	0
YDR026C		0.141047	CEN	sulfate	Not found	0
YDR026C		0.145537	CEN	Glucose	Not found	0
YDR022C	CIS1	0.108437	CEN	sulfate	Not found	0
YDL235C	YPD1	0.146084	MM1N	Glucose	Not found	0
YDL216C	RRI1	0.101421	2micron	Phosphate	Not found	0
YDL190C	UFD2	0.130362	CEN	sulfate	Not found	0
YDL185W	TFP1	0.135223	CEN	Glucose	Not found	0
YDL150W	RPC53	0.120667	CEN	sulfate	Not found	0
YDL150W	RPC53	0.126268	CEN	Glucose	Not found	0
YDL126C	CDC48	0.10194	2micron	Phosphate	Not found	0
YDL122W	UBP1	0.107019	2micron	sulfate	Not found	0
YDL099W	BUG1	0.147948	2micron	Phosphate	Not found	0
YDL083C	RPS16B	0.116308	CEN	Glucose	Not found	0
YDL079C	MRK1	0.101421	2micron	Phosphate	Not found	0
YDL060W	TSR1	0.141417	CEN	sulfate	Not found	0
YDL059C	RAD59	0.14892	CEN	sulfate	Not found	0
YDL029W	ARP2	0.122863	MM2N	Glucose	Not found	0
YDL016C		0.105043	MM2N	sulfate	Not found	0
YCR090C		0.172395	CEN	sulfate	Not found	0
YCR077C	PAT1	0.11311	MM1N	sulfate	Not found	0
YCR073W-A	SOL2	0.119725	MM2N	sulfate	Not found	0
YCR072C	RSA4	0.108316	CEN	sulfate	Moderate	1	YPD
YCR063W	BUD31	0.114989	MM2N	sulfate	Not found	0
YCR054C	CTR86	0.130036	CEN	sulfate	Low	1	YPD
YCR021C	HSP30	0.109828	CEN	Glucose	Not found	0
YCL047C		0.123862	MM2N	sulfate	Not found	0
YCL045C	EMC1	0.145497	CEN	sulfate	Not found	0
YCL035C	GRX1	0.10835	MM1N	Glucose	Not found	0
YCL029C	BIK1	0.110098	CEN	sulfate	Not found	0
YBR294W	SUL1	0.189443	CEN	sulfate	Moderate	4	sulfate
YBR294W	SUL1	0.428214	2micron	sulfate	Moderate	4	sulfate
YBR290W	BSD2	0.124768	2micron	sulfate	Amplification	1
YBR290W	BSD2	0.106369	2micron	Glucose	Amplification	1
YBR289W	SNF5	0.144337	CEN	sulfate	Amplification	1
YBR283C	SSH1	0.126748	2micron	sulfate	Amplification	1
YBR271W	EFM2	0.134632	CEN	Glucose	Moderate	1	Ammonium
YBR245C	ISW1	0.146046	CEN	Glucose	Not found	0
YBR220C		0.205002	CEN	sulfate	Not found	0
YBR220C		0.121834	2micron	Glucose	Not found	0
YBR217W	ATG12	0.16529	CEN	Glucose	Not found	0
YBR202W	MCM7	0.152471	CEN	sulfate	Not found	0
YBR200W	BEM1	0.135096	CEN	Glucose	Low	1	sulfate
YBR199W	KTR4	0.124942	CEN	sulfate	Not found	0
YBR192W	RIM2	0.155444	CEN	Glucose	Not found	0
YBR181C	RPS6B	0.127367	CEN	sulfate	Not found	0
YBR170C	NPL4	0.106241	MM1N	sulfate	Not found	0
YBR165W	UBS1	0.104438	2micron	Glucose	Not found	0
YBR158W	AMN1	0.116057	CEN	sulfate	Not found	0
YBR124W		0.101273	MM1N	sulfate	Not found	0
YBR098W	MMS4	0.14129	CEN	sulfate	Not found	0
YBR092C	PHO3	0.327688	CEN	sulfate	Not found	0
YBR092C	PHO3	0.101851	CEN	Glucose	Not found	0
YBR091C	TIM12	0.133464	MM2N	sulfate	Not found	0
YBR091C	TIM12	0.107244	MM1N	sulfate	Not found	0
YBR084C-A	RPL19A	0.104095	2micron	Phosphate	Not found	0
YBR084C-A	RPL19A	0.140308	2micron	Glucose	Not found	0
YBR061C	TRM7	0.121688	CEN	sulfate	Not found	0
YBR055C	PRP6	0.107752	CEN	Glucose	Not found	0
YBR055C	PRP6	0.107031	2micron	Glucose	Not found	0
YBR045C	GIP1	0.18089	CEN	Glucose	Moderate	1	YPD
YBR037C	SCO1	0.112551	2micron	Phosphate	Not found	0
YBR021W	FUR4	0.127167	2micron	Phosphate	Moderate	2	Allantoin
YBR020W	GAL1	0.120048	CEN	sulfate	Moderate	1	YPD
YBR020W	GAL1	0.133912	CEN	Glucose	Moderate	1	YPD
YBR006W	UGA2	0.120743	CEN	sulfate	Not found	0
YBR006W	UGA2	0.147217	CEN	Glucose	Not found	0
YBL063W	KIP1	0.106409	CEN	Glucose	High	1	sulfate
YBL060W	YEL1	0.101421	2micron	Phosphate	Not found	0
YBL041W	PRE7	0.108421	2micron	Phosphate	Not found	0
YBL037W	APL3	0.107545	CEN	sulfate	Not found	0
YBL026W	LSM2	0.136897	MM2N	sulfate	Not found	0
YBL013W	FMT1	0.143796	MM2N	sulfate	Not found	0
YBL003C	HTA2	0.116661	MM2N	sulfate	Not found	0
YAL056W	GPB2	0.100346	MM1N	Glucose	High	10	YPD
YAL051W	OAF1	0.149765	CEN	Glucose	Amplification	1
YAL044C	GCV3	0.11383	MM2N	sulfate	Not found	0
YAL028W	FRT2	0.105354	MM2N	sulfate	Not found	0
YAL005C	SSA1	0.121381	CEN	Glucose	Amplification	1
